# Supplementary material for: The effect of thermal dose on hyperthermia-mediated inhibition of DNA repair through homologous recombination
Source: PubMed Central journal article supplement (PMC5546504; doi:10.18632/oncotarget.17861), 2017-05-15
Supplement: oncotarget-08-44593-s001.pdf [file oncotarget-08-44593-s001.pdf]

# The effect of thermal dose on hyperthermia-mediated inhibition of DNA repair through homologous recombination

## SUPPLEMENTARY MATERIALS

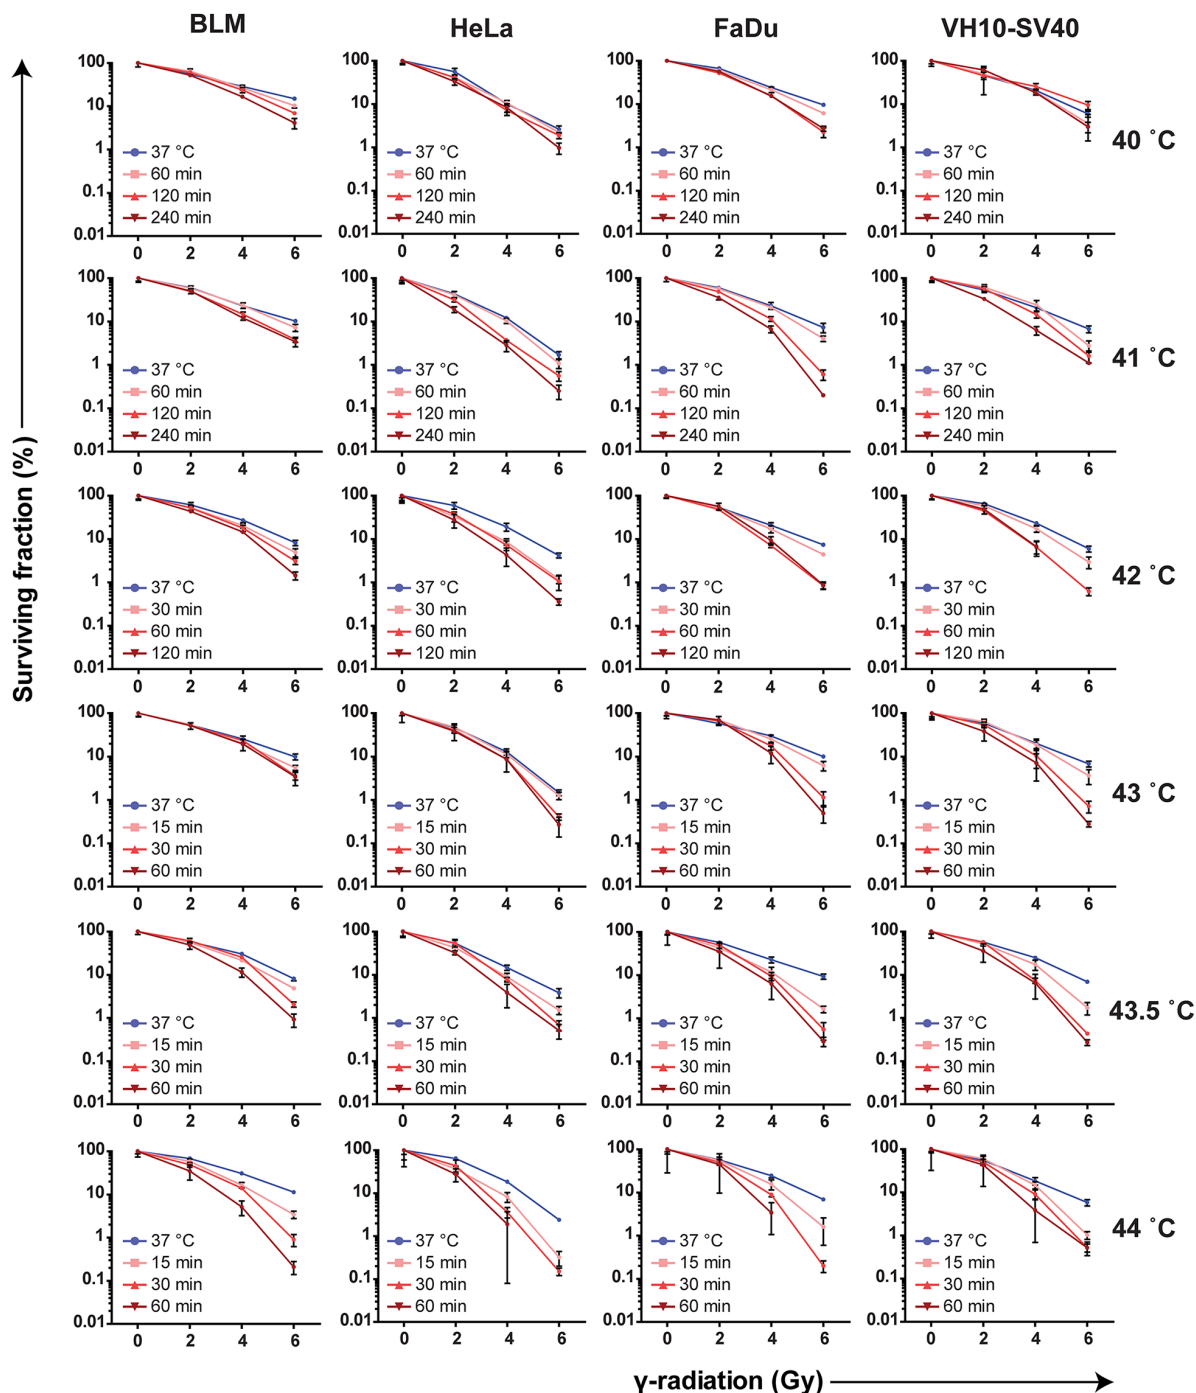

**Supplementary Figure 1: Colony cell survival at different thermal doses.** Colony survival curves of four cell lines (BLM, HeLa, FaDu and VH10-SV40) submitted to hyperthermia and irradiated afterwards in six independent experiments; one for each temperature. The points and bars represent mean ± SEM of triplicate measurements.

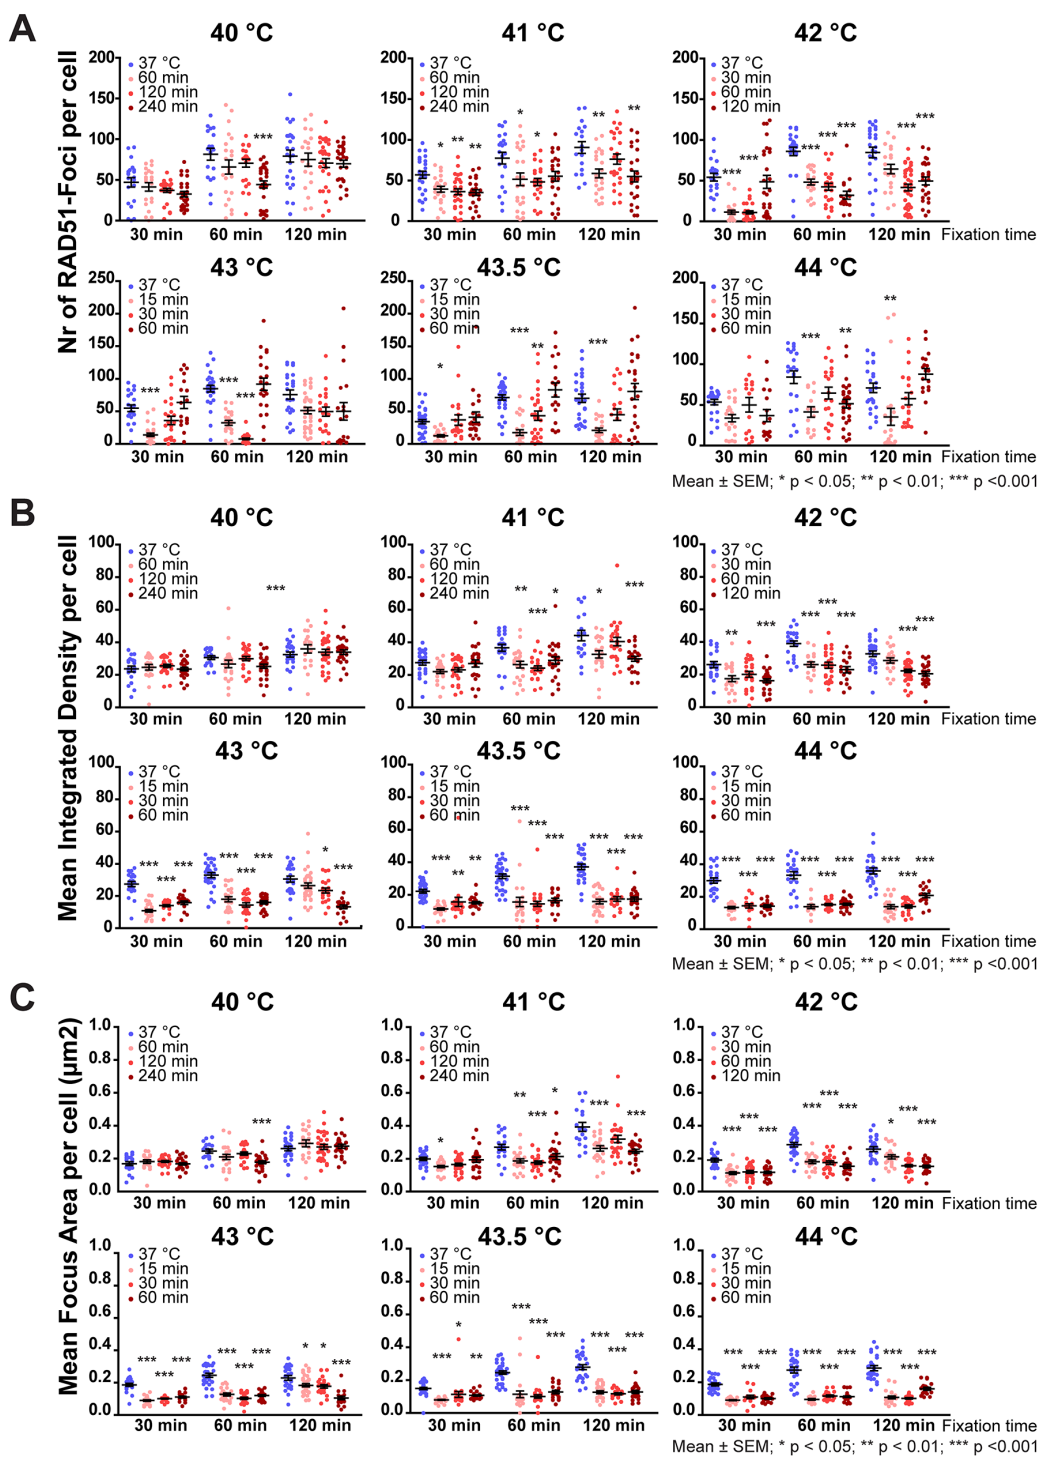

**Supplementary Figure 2: Quantification of RAD51 foci upon heat.** Each dot in the graphs represents a EdU-positive cell that was submitted to hyperthermia and irradiated with 4 Gy directly afterwards, either fixed 30, 60 or 120 minutes after irradiation (X-axis) and stained for EdU and RAD51. The bars represent mean  $\pm$  SEM for each thermal dose and fixation time. Several qualities of RAD51 foci and cells were measured: (A) number of foci per cell, (B) mean integrated density per cell, (C) mean focus area per cell. (Continued)

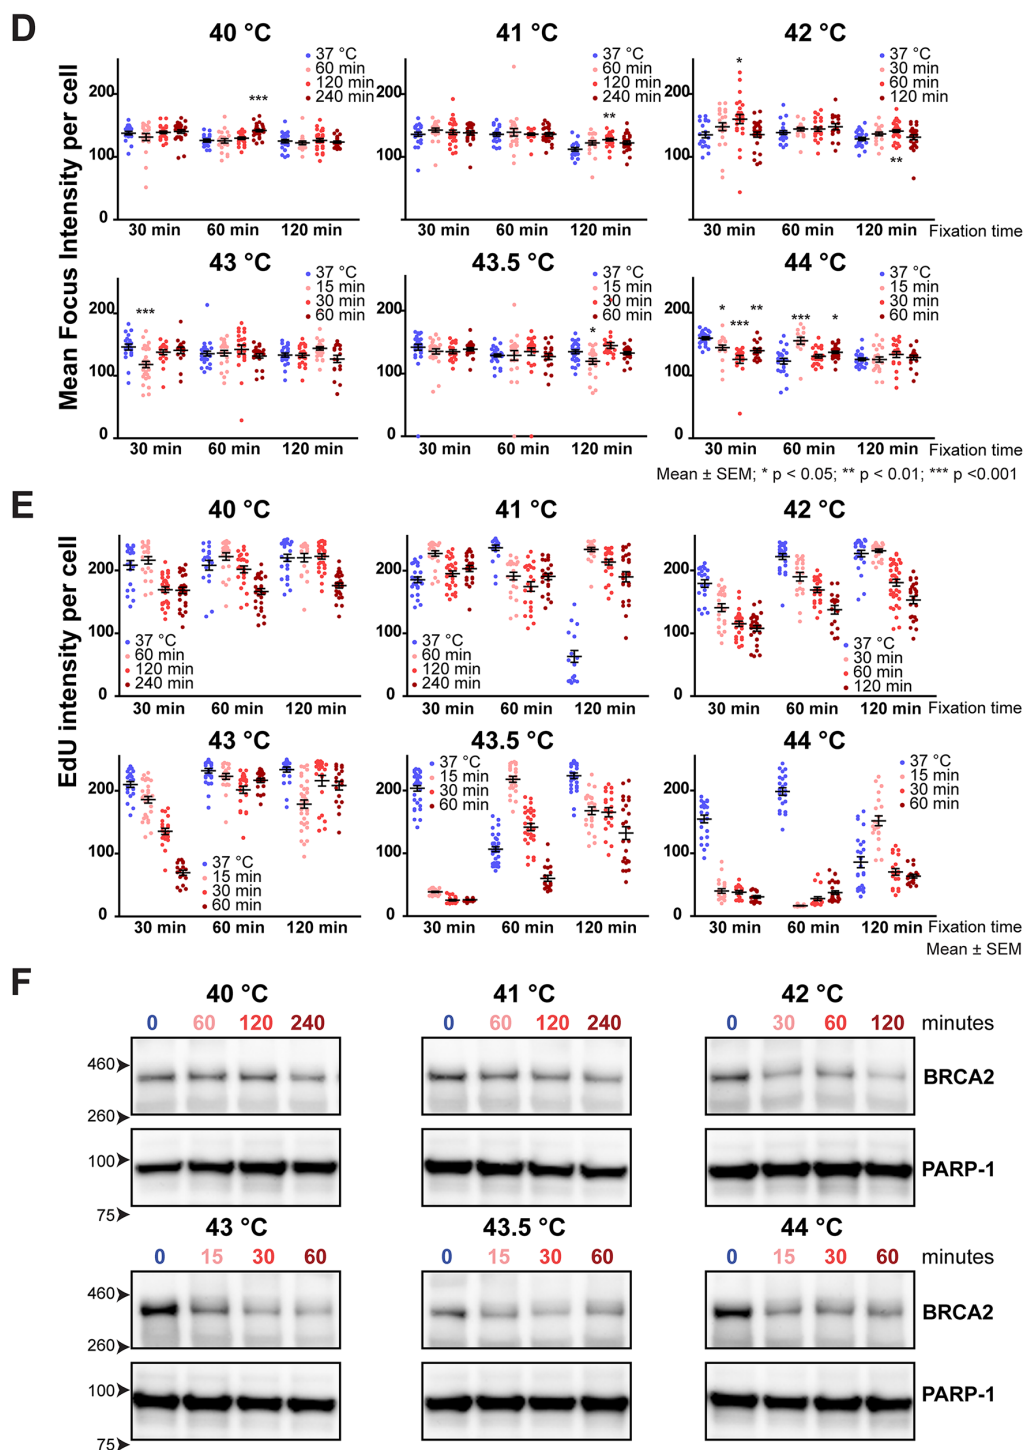

**Supplementary Figure 2: (Continued) Quantification of RAD51 foci upon heat.** (D) Mean focus intensity per cell. The statistical differences, indicated by asterisks, were determined by ANOVA followed by Tukey's Multiple Comparison Test. (E) EdU intensity per cell. Statistical differences are not given, some samples had a less intense EdU staining due to experimental variation and artefacts. However, the low EdU intensity at 43, 43.5 and 44 °C can be attributed to effects of hyperthermia, since they are consistent with each other. (F) Protein samples made from cells that were incubated at the different thermal doses simultaneously with the cells stained for RAD51. Immunoblot is a cropped representation of probing for BRCA2 and for PARP-1 as a loading control and confirms the effectiveness of BRCA2 degradation by heat.

**Supplementary Table 1: Summary of all measured outcomes.**

**See Supplementary File 1:**
